# Supplementary material
Source: PubMed Central journal article supplement (PMC379335)
Supplement: jcinvest_113_7_937__1.pdf [file jcinvest_113_7_937__1.pdf]

- S1. Busch, M.P., and Satten, G.A. 1997. Time course of viremia and antibody seroconversion following human immunodeficiency virus exposure. *Am. J. Med.* **102**:117-124.
- S2. Schreiber, G.B., Busch, M.P., Kleinman, S.H., and Korelitz, J.J. 1996. The risk of transfusion-transmitted viral infections. The Retrovirus Epidemiology Donor Study. *N. Engl. J. Med.* **334**:1685-1690.
- S3. Alkhatib, G., Combadiere, C., Broder, C.C., Feng, Y., Kennedy, P.E., Murphy, P.M., and Berger, E.A. 1996. CC CKR5: a RANTES, MIP-1alpha, MIP-1beta receptor as a fusion cofactor for macrophage-tropic HIV-1. *Science.* **272**:1955-1958.
- S4. Choe, H., Farzan, M., Sun, Y., Sullivan, N., Rollins, B., Ponath, P.D., Wu, L., Mackay, C.R., LaRosa, G., Newman, et al. 1996. The beta-chemokine receptors CCR3 and CCR5 facilitate infection by primary HIV-1 isolates. *Cell.* **85**:1135-1148.
- S5. Doranz, B.J., Rucker, J., Yi, Y., Smyth, R.J., Samson, M., Peiper, S.C., Parmentier, M., Collman, R.G., and Doms, R.W. 1996. A dual-tropic primary HIV-1 isolate that uses fusin and the beta-chemokine receptors CKR-5, CKR-3, and CKR-2b as fusion cofactors. *Cell.* **85**:1149-1158.
- S6. Dragic, T., Litwin, V., Allaway, G.P., Martin, S.R., Huang, Y., Nagashima, K.A., Cayananm C., Maddonm P,J,, Koup R,A,, Moorem J,P, et al. 1996. HIV-1 entry into CD4+ cells is mediated by the chemokine receptor CC-CKR-5. *Nature.* **381**:667-673.
- S7. Feng, Y., Broder, C.C., Kennedy, P.E., and Berger, E.A. 1996. HIV-1 entry cofactor: functional cDNA cloning of a seven-transmembrane, G protein-coupled receptor. *Science.* **272**:872-877.
- S8. Kwon, D.S., Gregorio, G., Bitton, N., Hendrickson, W.A., and Littman, D.R. 2002. DC-SIGN-mediated internalization of HIV is required for trans-enhancement of T cell infection. *Immunity.* **16**:135-144.
- S9. Gupta, P., Collins, K.B., Ratner, D., Watkins, S., Naus, G.J., Landers, D.V., and Patterson, B.K. 2002. Memory CD4+ T cells are the earliest detectable human immunodeficiency virus type 1 (HIV-1)-infected cells in the female genital

- mucosal tissue during HIV-1 transmission in an organ culture system. *J. Virol.* **76**:9868-9876.
- S10. Miller, J., and Shattock, R.J. 2003. Target cells in vaginal HIV transmission. *Microbes Infect.* **5**:59-67.
- S11. Schacker, T., Little, S., Connick, E., Gebhard, K., Zhang, Z.Q., Krieger, J., Pryor, J., Havlir, D., Wong, J.K., and Schooley, R.T. 2001. Productive infection of T cells in lymphoid tissues during primary and early human immunodeficiency virus infection. *J. Infect. Dis.* **183**:555-562.
- S12. Little, S.J., McLean, A.R., Spina, C.A., Richman, D.D., and Havlir, D.V. 1999. Viral dynamics of acute HIV-1 infection. *J. Exp. Med.* **190**:841-850.
- S13. Lindback, S., Karlsson, A.C., Mittler, J., Blaxhult, A., Carlsson, M., Briheim, G., Sonnerborg, A., and Gaines, H. 2000. Viral dynamics in primary HIV-1 infection. Karolinska Institutet Primary HIV Infection Study Group. *AIDS.* **14**:2283-2291.
- S14. Stafford, M.A., Corey, L., Cao, Y., Daar, E.S., Ho, D.D., and Perelson, A.S. 2000. Modeling plasma virus concentration during primary HIV infection. *J. Theor. Biol.* **203**:285-301.
- S15. Douek, D.C. 2003. Disrupting T-cell homeostasis: how HIV-1 infection causes disease. *AIDS Rev.* **5**:172-177.
- S16. Zaunders, J.J., Moutouh-de Parseval, L., Kitada, S., Reed, J.C., Rought, S., Genini, D., Leoni, L., Kelleher, A., Cooper, D.A., Smith, D.E., et al. 2003. Polyclonal proliferation and apoptosis of CCR5+ T lymphocytes during primary human immunodeficiency virus type 1 infection: regulation by interleukin (IL)-2, IL-15, and Bcl-2. *J. Infect. Dis.* **187**:1735-1747.
- S17. Zaunders, J.J., Kaufmann, G.R., Cunningham, P.H., Smith, D., Grey, P., Suzuki, K., Carr, A., Goh, L.E., and Cooper, D.A. 2001. Increased turnover of CCR5+ and redistribution of CCR5- CD4 T lymphocytes during primary human immunodeficiency virus type 1 infection. *J. Infect. Dis.* **183**:736-743.
- S18. Reynes, J., Portales, P., Segondy, M., Baillat, V., Andre, P., Reant, B., Avinens, O., Couderc, G., Benkirane, M., Clot, J., et al. 2000. CD4+ T cell surface CCR5 density as a determining factor of virus load in persons infected with human immunodeficiency virus type 1. *J. Infect. Dis.* **181**:927-932.

- S19. Wu, L., Paxton, W.A., Kassam, N., Ruffing, N., Rottman, J.B., Sullivan, N., Choe, H., Sodroski, J., Newman, W., Koup, R.A., et al. 1997. CCR5 levels and expression pattern correlate with infectability by macrophage-tropic HIV-1, in vitro. *J. Exp. Med.* **185**:1681-1691.
- S20. Wahl, S.M., McNeely, T.B., Janoff, E.N., Shugars, D., Worley, P., Tucker, C., and Orenstein, J.M. 1997. Secretory leukocyte protease inhibitor (SLPI) in mucosal fluids inhibits HIV-I. *Oral Dis.* **1**:S64-S69.
- S21. McNearney, T., Hornickova, Z., Kloster, B., Birdwell, A., Storch, G.A., Polmar, S.H., Arens, M., and Ratner, L. 1993. Evolution of sequence divergence among human immunodeficiency virus type 1 isolates derived from a blood donor and a recipient. *Pediatr Res.* **33**:36-42.
- S22. Zhang, L.Q., MacKenzie, P., Cleland, A., Holmes, E.C., Brown, A.J., and Simmonds, P. 1993. Selection for specific sequences in the external envelope protein of human immunodeficiency virus type 1 upon primary infection. *J. Virol.* **67**:3345-3356.
- S23. Amedee, A.M., Lacour, N., Gierman, J.L., Martin, L.N., Clements, J.E., Bohm, R. Jr., Harrison, R.M., and Murphey-Corb, M. 1995. Genotypic selection of simian immunodeficiency virus in macaque infants infected transplacentally. *J Virol.* **69**:7982-7990.
- S24. Cornelissen, M., Hogervorst, E., Zorgdrager, F., Hartman, S., and Goudsmit, J. 1995. Maintenance of syncytium-inducing phenotype of HIV type 1 is associated with positively charged residues in the HIV type 1 gp120 V2 domain without fixed positions, elongation, or relocated N-linked glycosylation sites. *AIDS Res. Hum. Retroviruses.* **11**:1169-1175.
- S25. Delwart, E., Magierowska, M., Royz, M., Foley, B., Peddada, L., Smith, R., Heldebrant, C., Conrad, A., and Busch, M. 2002. Homogeneous quasispecies in 16 out of 17 individuals during very early HIV-1 primary infection. *AIDS.* **16**:189-195.
- S26. Finzi, D., Blankson, J., Siliciano, J.D., Margolick, J.B., Chadwick, K., Pierson, T., Smith, K., Lisziewicz, J., Lori, F., Flexner, C., et al. 1999. Latent infection of

- CD4+ T cells provides a mechanism for lifelong persistence of HIV-1, even in patients on effective combination therapy. *Nat. Med.* **5**:512-517.
- S27. Finzi, D., Hermankova, M., Pierson, T., Carruth, L.M., Buck, C., Chaisson, R.E., Quinn, T.C., Chadwick, K., Margolick, J., Brookmeyer, R., et al. 1997. Identification of a reservoir for HIV-1 in patients on highly active antiretroviral therapy. *Science.* **278**:1295-1300.
- S28. Ramratnam, B., Mittler, J.E., Zhang, L., Boden, D., Hurley, A., Fang, F., Macken, C.A., Perelson, A.S., Markowitz, M., and Ho, D.D. 2000. The decay of the latent reservoir of replication-competent HIV-1 is inversely correlated with the extent of residual viral replication during prolonged anti-retroviral therapy. *Nat. Med.* **6**:82-85.
- S29. Furtado MR, Callaway DS, Phair JP, Kunstman KJ, Stanton JL, Macken CA, Perelson AS, Wolinsky SM. Persistence of HIV-1 transcription in peripheral-blood mononuclear cells in patients receiving potent antiretroviral therapy. *N Engl J Med.* 1999 May 27;340(21):1614-22.
- S30. Pilgrim, A.K., Pantaleo, G., Cohen, O.J., Fink, L.M., Zhou, J.Y., Zhou, J.T., Bolognesi, D.P., Fauci, A.S., and Montefiori, D.C. 1997. Neutralizing antibody responses to human immunodeficiency virus type 1 in primary infection and long-term-nonprogressive infection. *J. Infect. Dis.* **176**:924-932.
- S31. Moog, C., Fleury, H.J., Pellegrin, I., Kirn, A., and Aubertin, A.M. 1997. Autologous and heterologous neutralizing antibody responses following initial seroconversion in human immunodeficiency virus type 1-infected individuals. *J. Virol.* **71**:3734-3741.
- S32. Pellegrin, I., Legrand, E., Neau, D., Bonot, P., Masquelier, B., Pellegrin, J.L., Ragnaud, J.M., Bernard, N., and Fleury, H.J. 1996. Kinetics of appearance of neutralizing antibodies in 12 patients with primary or recent HIV-1 infection and relationship with plasma and cellular viral loads. *J. Acquir. Immune Defic. Syndr. Hum. Retrovirol.* **11**:438-447.
- S33. Connick, E., Marr, D.G., Zhang, X.Q., Clark, S.J., Saag, M.S., Schooley, R.T., and Curiel, T.J. 1996. HIV-specific cellular and humoral immune responses in primary HIV infection. *AIDS Res. Hum. Retroviruses.* **12**:1129-1140.

- S34. Wilson, J.D., Ogg, G.S., Allen, R.L., Davis, C., Shaunak, S., Downie, J., Dyer, W., Workman, C., Sullivan, S., McMichael, A.J., et al. 2000. Direct visualization of HIV-1-specific cytotoxic T lymphocytes during primary infection. *AIDS*. **14**:225-233.
- S35. Kuroda, M.J., Schmitz, J.E., Charini, W.A., Nickerson, C.E., Lifton, M.A., Lord, C.I., Forman, M.A., and Letvin, N.L. 1999. Emergence of CTL coincides with clearance of virus during primary simian immunodeficiency virus infection in rhesus monkeys. *J. Immunol.* **162**:5127-5133.
- S36. McMichael, A.J., and Rowland-Jones, S.L. 2001. Cellular immune responses to HIV. *Nature*. **410**:980-987.
- S37. Allen, T.M., O'Connor, D.H., Jing, P., Dzuris, J.L., Mothe, B.R., Vogel, T.U., Dunphy, E., Liebl, M.E., Emerson, C., Wilson, N., et al. 2000. Tat-specific cytotoxic T lymphocytes select for SIV escape variants during resolution of primary viraemia. *Nature*. **407**:386-390.
- S38. Goulder, P.J., Pasquier, C., Holmes, E.C., Liang, B., Tang, Y., Izopet, J., Saune, K., Rosenberg, E.S., Burchett, S.K., McIntosh, K., et al. 2001. Mother-to-child transmission of HIV infection and CTL escape through HLA-A2-SLYNTVATL epitope sequence variation. *Immunol. Lett.* **79**:109-116.
- S39. Yu, X.G., Addo, M.M., Rosenberg, E.S., Rodriguez, W.R., Lee, P.K., Fitzpatrick, C.A., Johnston, M.N., Strick, D., Goulder, P.J., Walker, B.D., et al. 2002. Consistent patterns in the development and immunodominance of human immunodeficiency virus type 1 (HIV-1)-specific CD8<sup>+</sup> T-cell responses following acute HIV-1 infection. *J. Virol.* **76**:8690-8701.
- S40. Goulder, P.J., Altfeld, M.A., Rosenberg, E.S., Nguyen, T., Tang, Y., Eldridge, R.L., Addo, M.M., He, S., Mukherjee, J.S., Phillips, M.N., et al. 2001. Substantial differences in specificity of HIV-specific cytotoxic T cells in acute and chronic HIV infection. *J. Exp. Med.* **193**:181-194.
- S41. Migueles, S.A., Sabbaghian, M.S., Shupert, W.L., Bettinotti, M.P., Marincola, F.M., Martino, L., Hallahan, C.W., Selig, S.M., Schwartz, D., Sullivan, J., et al. 2000. HLA B\*5701 is highly associated with restriction of virus replication in a

- subgroup of HIV-infected long term nonprogressors. *Proc. Natl. Acad. Sci. USA*. **97**:2709-2714.
- S42. Carrington, M., Nelson, G.W., Martin, M.P., Kissner, T., Vlahov, D., Goedert, J.J., Kaslow, R., Buchbinder, S., Hoots, K., O'Brien, S.J., et al. 1999. HLA and HIV-1: heterozygote advantage and B\*35-Cw\*04 disadvantage. *Science*. **283**:1748-1752.
- S43. O'Connor, D.H., Mothe, B.R., Weinfurter, J.T., Fuenger, S., Rehrauer, W.M., Jing, P., Rudersdorf, R.R., Liebl, M.E., Krebs, K., Vasquez, J., et al. 2003. Major histocompatibility complex class I alleles associated with slow simian immunodeficiency virus disease progression bind epitopes recognized by dominant acute-phase cytotoxic-T-lymphocyte responses. *J. Virol.* **77**:9029-9040.
- S44. Klein, M.R., Keet, I.P., D'Amato, J., Bende, R.J., Hekman, A., Mesman, B., Koot, M., de Waal, L.P., Coutinho, R.A., and Miedema, F. 1994. Associations between HLA frequencies and pathogenic features of human immunodeficiency virus type 1 infection in seroconverters from the Amsterdam cohort of homosexual men. *J. Infect. Dis.* **169**:1244-1249.
- S45. Altfeld, M., Addo, M.M., Rosenberg, E.S., Hecht, F.M., Lee, P.K., Vogel, M., Yu, X.G., Draenert, R., Johnston, M.N., Strick, D., et al. 2003. Influence of HLA-B57 on clinical presentation and viral control during acute HIV-1 infection. *AIDS*. **17**:2581-2591.
- S46. O'Connor, D.H., Allen, T.M., Vogel, T.U., Jing, P., DeSouza, I.P., Dodds, E., Dunphy, E.J., Melsaether, C., Mothe, B., Yamamoto, H., et al. 2002. Acute phase cytotoxic T lymphocyte escape is a hallmark of simian immunodeficiency virus infection. *Nat. Med.* **8**:493-499.
- S47. Vogel, T.U., Friedrich, T.C., O'Connor, D.H., Rehrauer, W., Dodds, E.J., Hickman, H., Hildebrand, W., Sidney, J., Sette, A., Hughes, A., et al. 2002. Escape in one of two cytotoxic T-lymphocyte epitopes bound by a high-frequency major histocompatibility complex class I molecule, Mamu-A\*02: a paradigm for virus evolution and persistence? *J. Virol.* **76**:11623-11636.
- S48. Mothe, B.R., Sidney, J., Dzuris, J.L., Liebl, M.E., Fuenger, S., Watkins, D.I., and Sette, A. 2002. Characterization of the peptide-binding specificity of Mamu-B\*17

- and identification of Mamu-B\*17-restricted epitopes derived from simian immunodeficiency virus proteins. *J. Immunol.* **169**:210-219.
- S49. Altfeld, M., Rosenberg, E.S., Shankarappa, R., Mukherjee, J.S., Hecht, F.M., Eldridge, R.L., Addo, M.M., Poon, S.H., Phillips, M.N., Robbins, G.K., et al. 2001. Cellular immune responses and viral diversity in individuals treated during acute and early HIV-1 infection. *J. Exp. Med.* **193**:169-180.
- S50. Kalams, S.A., Buchbinder, S.P., Rosenberg, E.S., Billingsley, J.M., Colbert, D.S., Jones, N.G., Shea, A.K., Trocha, A.K., and Walker, B.D. 1999. Association between virus-specific cytotoxic T-lymphocyte and helper responses in human immunodeficiency virus type 1 infection. *J. Virol.* **73**:6715-6720.
- S51. McNeil, A.C., Shupert, W.L., Iyasere, C.A., Hallahan, C.W., Mican, J.A., Davey, R.T. Jr., Connors, M., et al. 2001. High-level HIV-1 viremia suppresses viral antigen-specific CD4(+) T cell proliferation. *Proc. Natl. Acad. Sci. U.S.A.* **98**:13878-13883.
- S52. Ortiz, G.M., Nixon, D.F., Trkola, A., Binley, J., Jin, X., Bonhoeffer, S., Kuebler, P.J., Donahoe, S.M., Demoitie, M., Kakimoto, W.M., and et al. 1999. HIV-1-specific immune responses in subjects who temporarily contain virus replication after discontinuation of highly active antiretroviral therapy. *J. Clin. Invest.* **104**:R13-18.
- S53. Colven, R., Harrington, R.D., Spach, D.H., Cohen, C.J., and Hooton, T.M. 2000. Retroviral rebound syndrome after cessation of suppressive antiretroviral therapy in three patients with chronic HIV infection. *Ann. Intern. Med.* **133**:430-434.
- S54. Chun, T.W., Stuyver, L., Mizell, S.B., Ehler, L.A., Mican, J.A., Baseler, M., Lloyd, A.L., Nowak, M.A., and Fauci, A.S. 1997. Presence of an inducible HIV-1 latent reservoir during highly active antiretroviral therapy. *Proc. Nat. Acad. Sci. USA.* **94**:13193-13197.
- S55. Bartlett, J.A., Miralles, G.D., Sevin, A.D., Silberman, M., Pruitt, S.K., Ottinger, J., Gyszowska, V., Fiscus, S.A., and Bucy, R.P. 2002. Addition of cyclophosphamide to antiretroviral therapy does not diminish the cellular reservoir in HIV-infected persons. *AIDS Res. Hum. Retroviruses.* **18**:535-543.

- S56. Blankson, J.N., Persaud, D., and Siliciano, R.F. 2002. The challenge of viral reservoirs in HIV-1 infection. *Annu. Rev. Med.* **53**:557-593.
- S57. Romerio, F., Gabriel, M.N., and Margolis, D.M. 1997. Repression of human immunodeficiency virus type 1 through the novel cooperation of human factors YY1 and LSF. *J. Virol.* **71**:9375-9382.
- S58. Coull, J.J., Romerio, F., Sun, J.M., Volker, J.L., Galvin, K.M., Davie, J.R., Shi, Y., Hansen, U., and Margolis, D.M. 2000. The human factors YY1 and LSF repress the human immunodeficiency virus type 1 long terminal repeat via recruitment of histone deacetylase 1. *J. Virol.* **74**:6790-6799.
- S59. He, G., and Margolis, D.M. 2002. Counterregulation of chromatin deacetylation and histone deacetylase occupancy at the integrated promoter of human immunodeficiency virus type 1 (HIV-1) by the HIV-1 repressor YY1 and HIV-1 activator Tat. *Mol. Cell. Biol.* **22**:2965-2973.
- S60. UNAIDS, WHO. 2002. Epidemiological fact sheet on HIV/AIDS and sexually transmitted infections, 2002 update. *Geneva: Joint United Nations program on HIV/AIDS.*
- S61. Huang, Y., Paxton, W.A., Wolinsky, S.M., Neumann, A.U., Zhang, L., He, T., Kang, S., Ceradini, D., Jin, Z., Yazdanbakhsh, K., et al. 1996. The role of a mutant CCR5 allele in HIV-1 transmission and disease progression. *Nat. Med.* **2**:1240-1243.
- S62. Coombs, R.W., Reichelderfer, P.S., and Landay, A.L. 2003. Recent observations on HIV type 1 infection in the genital tract of men and women. *AIDS.* **17**:455-480.
- S63. Smith, S.M., Baskin, G.B., and Marx, P.A. 2000. Estrogen protects against vaginal transmission of simian immunodeficiency virus. *J. Infect. Dis.* **182**:708-715.
- S64. Moss, G. B., Clemetson, D., D'Costa, L., Plummer, F.A., Ndinya-Achola, J.O., Reilly, M., Holmes, K.K., Piot, P., Maitha, G.M., H.S.L., et al. 1991. Association of cervical ectopy with heterosexual transmission of human immunodeficiency virus: results of a study of couples in Nairobi, Kenya. *J. Infect. Dis.* **164**:588-591.



- S65. Leroy, V. 2001. Maternal plasma viral load, zidovudine, and mother-to-child transmission of HIV-1 in Africa. *AIDS*. **15**:517-522.
- S66. Thea, D.M. 1997. The effect of maternal viral load on the risk of perinatal transmission of HIV-1. *AIDS*. **11**:437-444.
- S67. Toossi, Z. 2001. Impact of tuberculosis on HIV-1 activity in dually infected patients. *Clinical Experimental Immunology*. **123**:233-238.
- S68. Gupta, P. 1997. High viral load in semen of human immunodeficiency viral type-1 infected men at all stages of disease and its reduction by therapy with protease and nonnucleoside reverse transcriptase inhibitors. *J. Virol*. **71**:6271-6275.
- S69. Mostad, S.B. 1997. Hormonal contraception, vitamin A deficiency, and other risk factors for shedding of HIV-1 infected cells from the cervix and the vagina. *Lancet*. **350**:922-927.
- S70. Baeten, J.M. 2001. Selenium deficiency is associated with shedding of HIV-1 infected cells in the female genital tract. *J. Acquir. Immune Defic. Syndr*. **26**:360-364.
- S71. Lafeuillade, A., Tamalet, C., Pellegrino, P., de Micco, P., Vignoli, C., and Quilichini, R. 1994. Correlation between surrogate markers, viral load, and disease progression in HIV-1 infection. *J. Acquir. Immune Defic. Syndr*. **7**:1028-1033.
- S72. Clark, S.J., Saag, M.S., Decker, W.D., Campbell-Hill, S., Roberson, J.L., Veldkamp, P.J., Kappes, J.C., Hahn, B.H., and Shaw, G.M. 1991. High titers of cytopathic virus in plasma of patients with symptomatic primary HIV-1 infection. *N. Engl. J. Med*. **324**:954-960.
- S73. Daar, E.S., Moudgil, T., Meyer, R.D., and Ho, D.D. 1991. Transient high levels of viremia in patients with primary human immunodeficiency virus type 1 infection. *N. Engl. J. Med*. **324**:961-964.
- S74. Pilcher, C.D., Staats, H.F., Fiscus, S.A., Cohen, M.S., Hicks, C.B., and Eron, J.J. Jr. 2001. Biological Correlates of Infectiousness in Semen in Primary HIV-1 Infection. *8<sup>th</sup> Conference on Retroviruses and Opportunistic Infections*. **412**. (Abstr.)

- S75. Peterman, T.A., Stoneburner, R.L., Allen, J.R., Jaffe, H.W., and Curran, J.W. 1988. Risk of human immunodeficiency virus transmission from heterosexual adults with transfusion-associated infections. *JAMA*. **259**:55-58.
- S76. Simon, V., Hogan, C., Louie, M., Vasan, S., Rowe, L., Hurley, A., Padte, N., Vanderhoeven, J., Dawson, K., Balfe, P., et al. 2003. Frequency of Transmitted Drug Resistance and Identification of Phylogenetic Clusters in a Homogenous Cohort of Newly Infected Individuals. *10<sup>th</sup> Conference on Retroviruses and Opportunistic Infections*. **504. (Abstr.)**
- S77. Staszewski, S., Schieck, E., Rehmet, S., Helm, E.B., and Stille, W. 1987. HIV transmission from male after only two sexual contacts. *Lancet*. **2**:628.
- S78. Arya, O.P., Rees, E., Turner, G.C., Percival, A., Bartzokas, C.A., Annels, E.H., Carey, P.B., Ghosh, A.K., Jephcott, A.E., and Johnston, N.A. 1984. Epidemiology of penicillinase-producing *Neisseria gonorrhoeae* in Liverpool from 1977 to 1982. *J. Infect.* **8**:70-83.
- S79. Zenilman, J.M., Bonner, M., Sharp, K.L., Rabb, J.A., and Alexander, E.R. 1988. Penicillinase-producing *Neisseria gonorrhoeae* in Dade County, Florida: evidence of core group transmitters and the impact of illicit antibiotics. *Sex. Transm. Dis.* **15**:45-50.
- S80. Zenilman, J.M., Glass, G., Shields, T., Jenkins, P.R., Baydos, J.C., and Mckee, K.T. 2002. Geographic epidemiology of gonorrhoea and chlamydia on a large military installation: application of a GIS system. *Sex. Transm. Infect.* **78**:40-44.
- S81. Rothenberg, R.B. 2002. The transformation of partner notification. *Clin. Infect. Dis.* **35**:S138-S145.
- S82. Rothenberg, R., Kimbrough, L., Lewis-Hardy, R., Heath, B., Williams, O.C., Tambe, P., Johnson, D., and Schrader, M. 2000. Social network methods for endemic foci of syphilis: a pilot project. *Sex. Transm. Dis.* **27**:12-18.
